# Supplementary material for: Role of the lncRNA–mRNA network in atherosclerosis using ox-low-density lipoprotein-induced macrophage-derived foam cells
Source: Royal Society of Chemistry journal article supplement (doi:10.1039/d0mo00077a), 2020-09-07
Supplement: d0mo00077a1.pdf [file d0mo00077a1.pdf]

**Supplement Table 1.** Summary of RNA sequencing and mapping using the human genome as the reference.

| Sample name | Raw reads | Clean reads | clean bases (G) | Error rate (%) | Q20 (%) | Q30 (%) | GC content (%) |
|-------------|-----------|-------------|-----------------|----------------|---------|---------|----------------|
| C_1         | 99748474  | 96664918    | 14.50           | 0.01           | 97.43   | 93.53   | 47.49          |
| C_2         | 87971062  | 85654450    | 12.85           | 0.01           | 97.54   | 93.79   | 46.97          |
| C_3         | 96250922  | 92233510    | 13.84           | 0.01           | 97.66   | 94.02   | 47.52          |
| M_1         | 97517412  | 94017030    | 14.10           | 0.01           | 97.62   | 93.93   | 47.51          |
| M_2         | 88530574  | 84432966    | 12.66           | 0.01           | 97.87   | 94.36   | 47.32          |
| M_3         | 96093458  | 93303762    | 14.00           | 0.02           | 96.20   | 91.17   | 47.46          |

Raw reads: number of raw sequencing reads; Clean reads: filtered sequencing data; Clean bases: the number of branches of clean reads multiplied by the length and converted into the units of G; Error rate: error rate of the sequencing; Q20: the percentage of filtered bases was greater than 20% of the total bases; Q30: the percentage of filtered bases was greater than 30% of the total bases; GC content: the percentage of the total number of G and C bases out of the total number of bases (clean data)
